# Supplementary material for: Fluorescence detection of vitamin B12 in human plasma and urine samples using silver nanoparticles embedded in chitosan in micellar media
Source: Royal Society of Chemistry journal article supplement (doi:10.1039/c7ay01297g), 2017-01-01
Supplement: c7ay01297g1.pdf [file c7ay01297g1.pdf]

## SUPPLEMENTARY

### Fluorescence detection of vitamin B12 in human plasma and urine samples using silver nanoparticles embedded into chitosan in micellar media

Nahid Pourreza\*, Roya Mirzajani, Jafar Burromandpiroze

*Department of Chemistry, Faculty of Science, Shahid Chamran University of Ahvaz, Ahvaz, Iran*

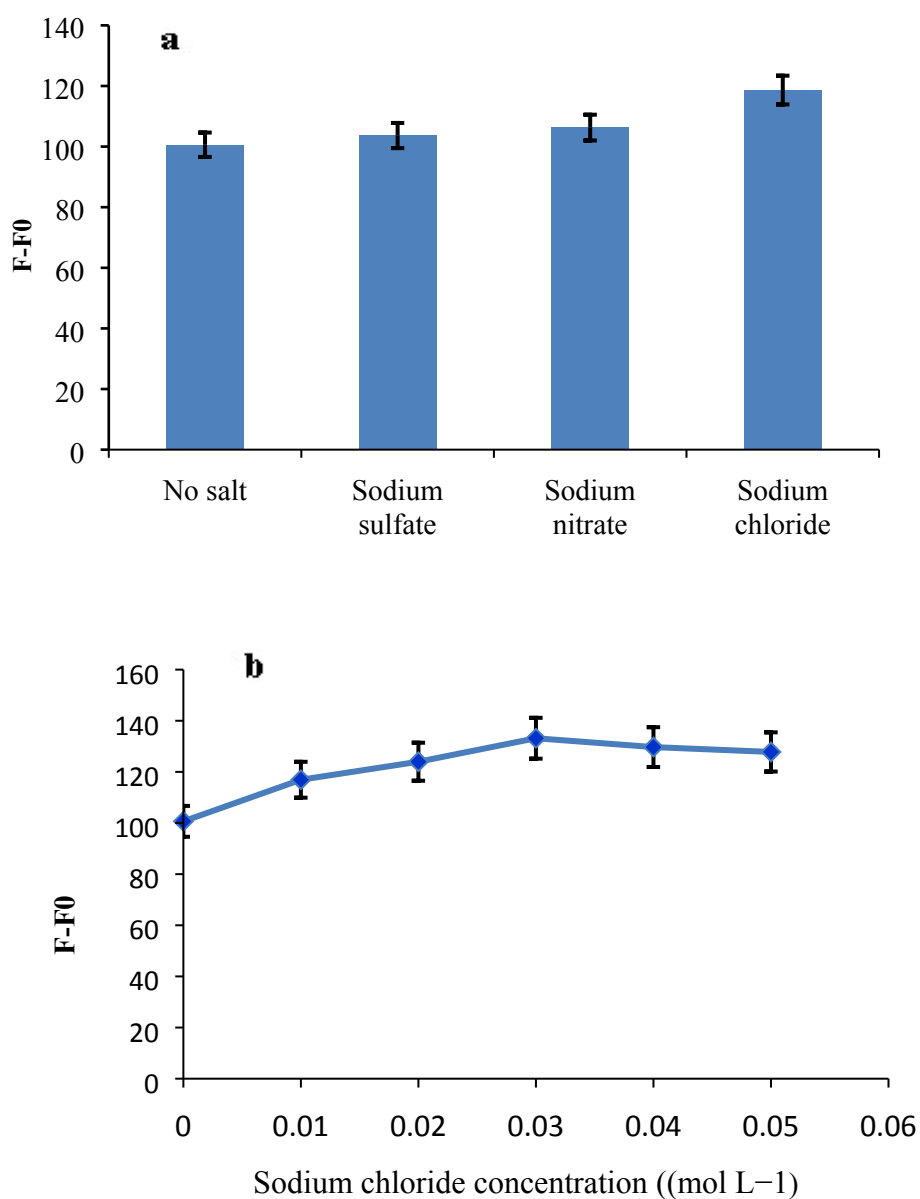

**Fig. S1** (a) Effect of different types of electrolytes and (b) effect of sodium chloride concentration on the cloud point extraction of vitamin B12. Each number is average of three determinations

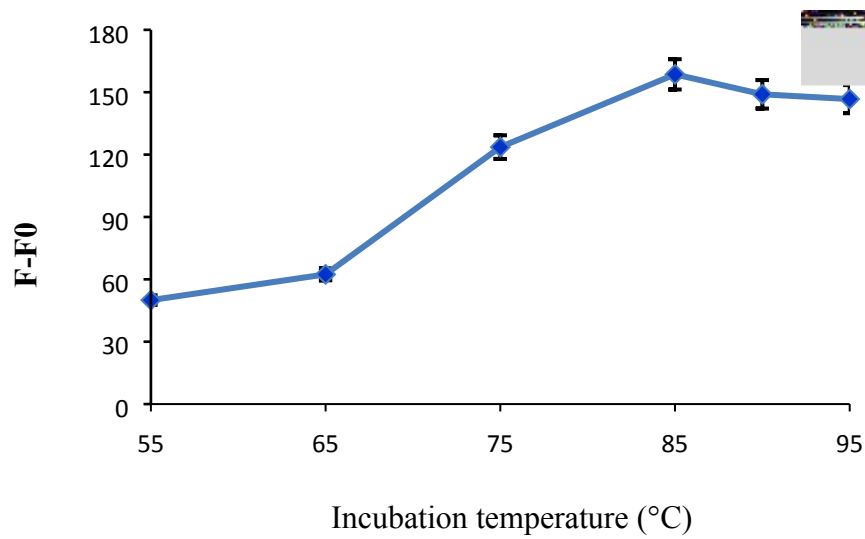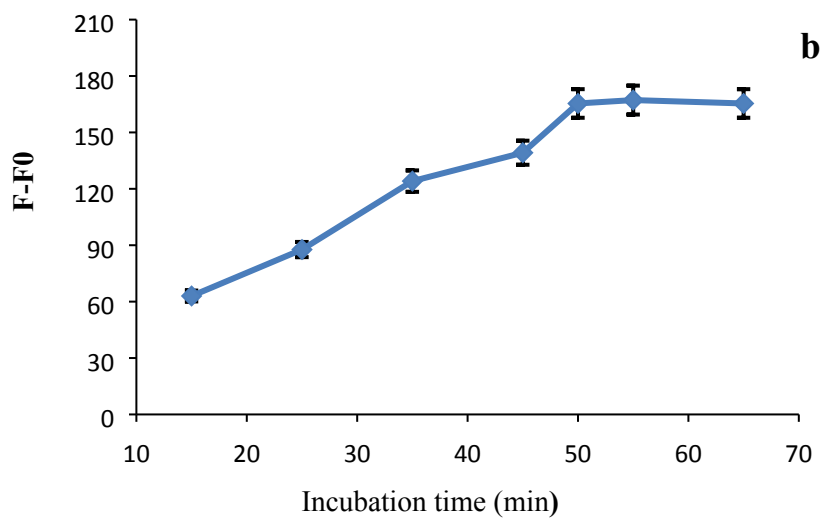

**Fig. S2** Effect of (a) incubation temperature and (b) incubation time on the cloud point extraction of vitamin B12
